# Supplementary material for: Investigation of the configuration of alkyl phenyl ketone phenylhydrazones from ab initio 1H NMR chemical shiftsElectronic supplementary information (ESI) available: Full geometry optimization at the B3LYP/6-31G(d) level of approximation. See http://www.rsc.org/suppdata/ob/b3/b307528a/
Source: Royal Society of Chemistry journal article supplement (doi:10.1039/b307528a), 2003-01-01
Supplement: b307528a.doc [file b307528a.doc]

# Supplementary data

Full geometry optimization at the B3LYP/6-31G(d) level of approximation

R = Me, R' = Et; E conformer

c -2.364578 -0.464625 -0.000718

n -1.179441 0.033454 -0.053576

c -2.659423 -1.948837 -0.002810

c -3.539969 0.483764 0.060642

n -0.114701 -0.805543 -0.125330

c -3.185442 1.970321 0.058180

h -2.639622 2.243453 -0.849947

h -2.548604 2.224515 0.910839

h -3.736370 -2.135495 0.010405

h -2.245567 -2.438983 -0.895493

h -2.229261 -2.452796 0.875667

h -0.245312 -1.797052 0.046907

c 1.189853 -0.314455 -0.049681

c 1.468676 1.061080 -0.085056

c 2.251530 -1.230248 0.037937

c 2.790521 1.497680 -0.032859

c 3.567041 -0.776608 0.088287

c 3.849473 0.590530 0.053562

h 0.646567 1.763239 -0.150507

h 2.041788 -2.298109 0.064414

h 2.992955 2.565636 -0.059753

h 4.375450 -1.500197 0.156789

h 4.876188 0.942385 0.093505

h -4.095450 2.577966 0.111346

h -4.208831 0.257066 -0.785097

h -4.131035 0.241383 0.958357

R = Me, R' = Et; Z conformer

c 2.329313 0.557386 -0.227599

n 1.068617 0.725093 -0.022431

c 3.201325 1.781644 -0.144524

c 3.004145 -0.773500 -0.503213

n 0.230700 -0.344030 -0.048156

c 3.257536 -1.591677 0.779158

h 2.322785 -1.802068 1.309314

h 3.910448 -1.044154 1.467393

h 3.708524 1.972684 -1.100520

h 2.601904 2.656793 0.116712

h 3.989921 1.656934 0.611155

h 0.562986 -1.231659 -0.412991

c -1.154114 -0.153827 -0.027793

c -1.726451 1.099061 0.242368

c -1.990640 -1.259326 -0.253132

c -3.112833 1.228510 0.284304

c -3.374759 -1.112560 -0.207144

c -3.948903 0.131558 0.061751

h -1.076223 1.948506 0.412139

h -1.552282 -2.233518 -0.462613

h -3.543953 2.204539 0.493385

h -4.006462 -1.979118 -0.385472

h -5.028570 0.244247 0.096368

h 3.740632 -2.546529 0.543921

h 2.408941 -1.370837 -1.210682

h 3.958419 -0.586867 -1.009052

R = Me, R' = Ph; E conformer

c 1.061839 0.992995 0.095906

n -0.038848 0.308662 0.060125

c 1.075254 2.502879 0.200119

n -1.220415 0.948699 0.114142

h 0.697013 2.983273 -0.714000

h -1.256814 1.962593 0.106786

c -2.431003 0.259681 0.018876

c -2.482302 -1.138445 -0.093003

c -3.626498 0.996230 0.043902

c -3.717786 -1.776154 -0.175610

c -4.853000 0.342455 -0.040642

c -4.910231 -1.048430 -0.150475

h -1.556741 -1.700405 -0.117846

h -3.591067 2.080616 0.131713

h -3.745888 -2.859409 -0.263077

h -5.768828 0.927512 -0.020158

h -5.867797 -1.556492 -0.216329

h 0.440539 2.836991 1.033218

h 2.075706 2.891403 0.391335

c 2.326264 0.222428 0.041806

c 2.343170 -1.144481 0.381942

c 3.520120 -1.882463 0.321274

c 4.715705 -1.278514 -0.080669

c 4.715147 0.072812 -0.423101

c 3.535308 0.815409 -0.361353

h 1.418277 -1.611853 0.701679

h 3.507840 -2.934122 0.596233

h 5.635411 -1.855645 -0.123480

h 5.634624 0.555165 -0.744653

h 3.560641 1.860431 -0.655142

R = Me, R' = Ph; Z conformer

c 1.108526 1.449804 0.122648

n -0.171394 1.279877 0.172302

c 1.599145 2.876132 0.150641

n -0.702400 0.036322 0.127618

h 2.275910 3.046112 0.998199

h -0.104431 -0.747016 -0.123388

c -2.082844 -0.140165 0.005508

c -2.983643 0.926255 0.153554

c -2.577109 -1.431070 -0.243899

c -4.352653 0.690852 0.050407

c -3.949052 -1.649004 -0.342269

c -4.849267 -0.591519 -0.196487

h -2.596395 1.919925 0.343336

h -1.882631 -2.260873 -0.360955

h -5.040182 1.525306 0.165194

h -4.313824 -2.654309 -0.537322

h -5.918779 -0.763677 -0.274479

h 2.160271 3.131009 -0.758142

h 0.746769 3.554811 0.231795

c 2.125242 0.356278 0.052646

c 2.137614 -0.685552 0.997973

c 3.109921 -1.684998 0.946980

c 4.086024 -1.665081 -0.050606

c 4.087258 -0.635389 -0.993912

c 3.119990 0.367195 -0.939761

h 1.391367 -0.697560 1.787808

h 3.107510 -2.475990 1.692294

h 4.842280 -2.444228 -0.090997

h 4.843982 -0.612047 -1.773632

h 3.129790 1.162714 -1.679688

R = Et, R' = Ph; E-conformer

c -1.019505 0.738867 -0.245432

n 0.104888 0.112673 -0.082140

c -1.115156 2.230802 -0.511624

n 1.271603 0.777113 -0.148727

c -1.036214 3.089399 0.766703

h -0.105977 2.907399 1.315875

h -1.864593 2.856551 1.443654

h 1.291419 1.759480 -0.402703

c 2.496787 0.113429 -0.057298

c 2.579839 -1.257638 0.231052

c 3.675741 0.853085 -0.245767

c 3.829375 -1.865929 0.323921

c 4.916701 0.229237 -0.148037

c 5.005267 -1.134967 0.136529

h 1.667666 -1.822231 0.380038

h 3.616106 1.916525 -0.470237

h 3.881806 -2.928535 0.547550

h 5.819100 0.816314 -0.297881

h 5.974009 -1.620023 0.211610

h -1.084862 4.156563 0.522826

h -0.318462 2.531604 -1.208133

h -2.045411 2.446700 -1.044459

c -2.251917 -0.079354 -0.137077

c -2.184658 -1.486370 -0.178049

c -3.332833 -2.262370 -0.069932

c -4.585562 -1.659195 0.082961

c -4.670061 -0.268912 0.127172

c -3.518353 0.512020 0.016721

h -1.215882 -1.956514 -0.304449

h -3.252708 -3.345736 -0.111255

h -5.482358 -2.267428 0.164064

h -5.634913 0.216297 0.250364

h -3.617072 1.591910 0.068134

R = Et, R' = Ph; Z-conformer

c 1.041558 1.147870 -0.188734

n -0.246197 1.091686 -0.092578

c 1.642982 2.525221 -0.371728

n -0.873160 -0.096936 0.061086

c 2.505425 2.980367 0.818098

h 3.340438 2.293214 0.993134

h 1.908165 3.026768 1.735560

h -0.343249 -0.955774 -0.064061

c -2.265779 -0.179793 -0.003903

c -2.863978 -1.450548 -0.028168

c -3.078312 0.964937 -0.016871

c -4.250818 -1.571448 -0.063957

c -4.463749 0.825736 -0.054354

c -5.063489 -0.435958 -0.077570

h -2.238279 -2.341033 -0.019168

h -2.611330 1.942183 -0.000220

h -4.696452 -2.562797 -0.083763

h -5.082276 1.719884 -0.065783

h -6.144877 -0.532657 -0.106229

h 2.922301 3.976891 0.633660

h 2.258153 2.542584 -1.283075

h 0.816969 3.225536 -0.529882

c 1.961077 -0.029233 -0.110873

c 1.933645 -0.900797 0.993212

c 2.810978 -1.982960 1.071852

c 3.731042 -2.216819 0.048596

c 3.771449 -1.358362 -1.052065

c 2.898179 -0.274047 -1.129031

h 1.231446 -0.715481 1.801756

h 2.779146 -2.639307 1.937530

h 4.413627 -3.060038 0.109414

h 4.484483 -1.533325 -1.853387

h 2.935982 0.385102 -1.992067

R = iPr, R' = Ph; E-conformer

c 1.019357 0.634344 0.038590

n -0.113171 0.004644 0.021309

c 1.213857 2.153775 0.109521

n -1.292193 0.648354 0.066019

c 0.700586 2.901225 -1.140452

h -0.384731 2.833121 -1.273107

h 1.159627 2.500243 -2.050346

h -1.335782 1.659170 0.097569

c -2.500244 -0.047472 -0.014420

c -2.545210 -1.443829 -0.149769

c -3.699794 0.680632 0.046127

c -3.778229 -2.088110 -0.217721

c -4.923637 0.020330 -0.025356

c -4.974577 -1.368948 -0.156711

h -1.616617 -1.998656 -0.203847

h -3.669749 1.763626 0.151423

h -3.801279 -3.169942 -0.322965

h -5.842468 0.599057 0.023102

h -5.930108 -1.882103 -0.212073

h 0.954710 3.965513 -1.072104

h 2.293923 2.320732 0.139307

c 2.219624 -0.247656 0.013943

c 2.149546 -1.551818 0.540850

c 3.253137 -2.398524 0.512624

c 4.461146 -1.968550 -0.043891

c 4.547232 -0.681839 -0.573896

c 3.441783 0.169281 -0.542770

h 1.215269 -1.883992 0.980281

h 3.173662 -3.397115 0.934922

h 5.324170 -2.628659 -0.061251

h 5.476494 -0.335580 -1.019032

h 3.534324 1.157271 -0.984439

c 0.683697 2.762171 1.428155

h 0.959725 3.821477 1.484952

h -0.404494 2.703597 1.535311

h 1.121220 2.251177 2.292049

R = iPr, R' = Ph; Z-conformer

c 1.033556 0.917956 -0.092752

n -0.253280 0.884879 -0.000256

c 1.706158 2.281550 -0.194437

n -0.905183 -0.296191 0.095497

c 0.722399 3.421284 -0.479390

h 0.010394 3.540254 0.343331

h 0.144958 3.233781 -1.389779

h -0.388472 -1.159089 -0.053599

c -2.298097 -0.351508 0.021472

c -3.091061 0.806874 0.040798

c -2.918292 -1.610212 -0.047711

c -4.478527 0.693091 -0.008935

c -4.306656 -1.705628 -0.095793

c -5.099783 -0.556402 -0.076977

h -2.608324 1.775181 0.091780

h -2.308139 -2.511300 -0.063616

h -5.081381 1.597856 0.005207

h -4.769118 -2.687927 -0.150650

h -6.182457 -0.633344 -0.115192

h 1.268016 4.364225 -0.600595

h 2.415287 2.225610 -1.035223

c 1.913337 -0.294367 -0.081712

c 1.905836 -1.184144 1.007664

c 2.738756 -2.303694 1.021456

c 3.592128 -2.556861 -0.053820

c 3.609969 -1.681839 -1.141814

c 2.780695 -0.560533 -1.154172

h 1.252645 -0.985916 1.853522

h 2.724178 -2.974854 1.876167

h 4.240163 -3.428997 -0.043485

h 4.270065 -1.872878 -1.983782

h 2.797446 0.111214 -2.008291

c 2.537712 2.572776 1.073221

h 3.089720 3.513348 0.962507

h 1.882684 2.664764 1.947929

h 3.262798 1.777198 1.274477

R = tButyl, R' = Ph; E-conformer

c 0.906287 0.513789 0.022728

n -0.259401 -0.046536 0.040192

c 1.212285 2.033563 0.103609

n -1.419917 0.637775 0.091611

c 0.595503 2.614981 1.404748

h 1.063509 2.156611 2.282835

h -0.481716 2.457782 1.498138

h -1.440851 1.640770 -0.041546

c -2.641164 -0.039422 -0.006924

c -2.713399 -1.440609 -0.008834

c -3.822818 0.714798 -0.083048

c -3.956760 -2.064017 -0.086243

c -5.057738 0.075314 -0.159340

c -5.136154 -1.318713 -0.161408

h -1.796705 -2.014899 0.046342

h -3.771176 1.802147 -0.080142

h -4.001321 -3.150297 -0.088745

h -5.962965 0.674192 -0.218466

h -6.099941 -1.815777 -0.221417

h 0.780741 3.694656 1.451109

c 2.016689 -0.495928 -0.015860

c 2.136524 -1.437410 1.017667

c 3.134388 -2.411869 0.987814

c 4.028217 -2.468301 -0.082652

c 3.910967 -1.547624 -1.125647

c 2.915253 -0.571501 -1.092022

h 1.433539 -1.400015 1.844597

h 3.211523 -3.128748 1.801319

h 4.805616 -3.227305 -0.107880

h 4.589767 -1.594591 -1.973347

h 2.819013 0.120467 -1.924353

c 2.728868 2.314881 0.191862

h 2.884651 3.387953 0.354527

h 3.191141 1.775753 1.024418

h 3.261360 2.036907 -0.720987

c 0.678216 2.779473 -1.145471

h 0.908588 3.849084 -1.069209

h 1.153095 2.398095 -2.056088

h -0.403626 2.690112 -1.289603

R = tButyl, R' = Ph; Z-conformer

c 0.980045 0.756188 -0.000034

n -0.308784 0.824845 -0.000271

c 1.774029 2.070261 -0.000059

n -1.044719 -0.306028 -0.000322

c 0.827485 3.283172 -0.000502

h 0.180886 3.285904 0.881985

h 0.181175 3.285478 -0.883199

h -0.579471 -1.209194 0.000262

c -2.437086 -0.270094 -0.000068

c -3.151030 0.939317 -0.000082

c -3.141772 -1.485866 0.000150

c -4.543740 0.917347 0.000120

c -4.534166 -1.488790 0.000362

c -5.248643 -0.288923 0.000347

h -2.604253 1.874405 -0.000248

h -2.593383 -2.425941 0.000147

h -5.084360 1.860751 0.000111

h -5.062171 -2.439075 0.000537

h -6.334687 -0.293928 0.000510

h 1.416869 4.207847 -0.000617

c 1.705879 -0.561342 0.000053

c 2.025493 -1.205928 1.206945

c 2.666309 -2.446194 1.206901

c 2.990484 -3.068106 0.000002

c 2.664879 -2.446876 -1.206880

c 2.024065 -1.206627 -1.206868

h 1.769556 -0.729518 2.149380

h 2.910261 -2.926351 2.150858

h 3.489873 -4.033203 -0.000029

h 2.907743 -2.927573 -2.150844

h 1.767035 -0.730701 -2.149255

c 2.673192 2.135343 1.257304

h 3.250909 3.067436 1.258049

h 2.071568 2.112156 2.173614

h 3.383664 1.302835 1.292602

c 2.673759 2.134851 -1.257089

h 3.251667 3.066829 -1.257810

h 3.384055 1.302165 -1.291882

h 2.072486 2.111560 -2.173627
